# Supplementary material
Source: PubMed Central journal article supplement (PMC4500250)
Supplement: pnas.1500524112.sapp.pdf [file pnas.1500524112.sapp.pdf]

## SUPPORTING INFORMATION

### Section 1. Methods

#### 1.1 Electronic tagging

Archival tag data for Pacific bluefin tuna *Thunnus orientalis* (PBFT), yellowfin tuna *T. albacares* (YFT), and albacore tuna *T. alalunga* (ALB) collected between 2002 and 2009 as part of the Tagging of Pacific Predators (TOPP) project (Block *et al.*) (1) were analyzed to identify periods of spatial and temporal overlap between these three tuna species. We identified overlap as periods when all three tuna species occurred within a  $0.5 \times 0.5$  degree area during a seven day period. We used a sensitivity analysis for combinations of grid size (0.25, 0.5, and 1 degree grids) and time periods (1 – 14 days) to determine this window. Combinations of lower grid size and/or short timeframes resulted in too few data for analysis, while largest grid size and/or timeframes resulted in maximum data points but inclusion of data from days that were likely not representative of actual overlap. A 0.5 degree grid and 7 day time period maintained a reasonable sample size while keeping spatial resolution fine enough to ensure that all three species were overlapping (Figure S1). We restricted our analysis to months for which we had stomach content data (July – October). Because ALB were primarily tagged during 2004 and 2005, those are the years during which there were periods of overlap in all three species. Hence results presented in this paper are from this period, however further analysis of the entire dataset (2002-2009) demonstrated that the relative patterns of depth and temperature distribution between these species during the 2004-2005 time period was consistent across the entire tag dataset.

For each week of data, we searched for all grid cells where all three species occurred. Each cell where overlap occurred became the core of an overlap area. The maximum and minimum possible latitude and longitude of fish within that cell was estimated to account for geolocation error ( $\pm 1.9^\circ$  latitude,  $\pm 0.8^\circ$  longitude) (1). The grid area encompassed by this maximum and minimum latitude and longitude was used to identify all fish that could have also overlapped with fish in the core overlap cell given geolocation error. All data from fish within this overlap area were compiled and used to quantify the extent to which these three species vertically and thermally partitioned their environment during periods of overlap.

To describe each species' vertical and thermal distribution during periods of overlap, we calculated proportion of time spent at depth (TAD) and time spent at temperature (TAT) by time of day in fifteen minute intervals as described in Carlisle *et al.* (2) for each fish selected for analysis. Mean TAD and TAT figures were then generated for each species (Fig. S3). To directly assess which particular species used particular depths or temperatures to the greatest extent, we determined which species spent the greatest proportion of time in each time and depth or temperature bin. To validate that fish were indeed occurring in the same (or similar) bodies of water with the same thermal characteristics during periods of overlap, we calculated the temperature-depth profile for each day of data and plotted mean ( $\pm$  SD) temperature depth profiles for each species (Fig. S2). For each day we also estimated the depth of the isothermal layer, which is a proxy for mixed layer depth, using the method described by Kara *et al.* (3).

To test for inter-specific differences in TAD and TAT, for each individual fish we calculated total proportion of time spent in each bin, using 10 m depth bins and 1 and 5°C temperature bins (see Table S3) for PBFT ( $n = 43$ ), YFT ( $n = 31$ ), and ALB ( $n = 13$ ). Proportions of TAD and TAT were arcsine-transformed and compared using 1-way ANOVA for each depth and temperature bin, using individual fish as replicates for a given species. Tukey's honest significant difference criterion was used for the multiple comparison test. Significant differences are reported for  $\alpha = 0.05$  and  $\alpha = 0.1$  (table S3). We only reported differences when one species spent significantly more time in a given bin than the other two species.

## 1.2 Cardiac gene expression

Pacific bluefin tuna *Thunnus orientalis* (PBFT;  $n = 7$ ), yellowfin tuna *T. albacares* (YFT;  $n = 5$ ) and albacore tuna *T. alalunga* (ALB;  $n = 8$ ) individuals were caught in the month of June 2008 off the coast of Baja California by hook and line fishing on board the F/V Shogun. Immediately following capture the individuals were euthanized and cardiac tissue was excised and placed in RNAlater® (Applied Biosystems, Foster City, CA, USA) at 4°C followed by freezing at -80 °C for long term storage. Curved fork length of the specimens ranged from 80 to 95 cm.

Cardiac ventricle tissue samples were homogenized with a TissueLyser II and stainless steel beads (Qiagen, Valencia, CA, USA). Total RNA was purified from cardiac samples using TRIZOL® reagent as recommended by the manufacturer (Invitrogen Life Technologies, Carlsbad, CA, USA). Concentration and purity of the RNA were determined using a spectrophotometer (NanoDrop® ND-1000, NanoDrop Technologies Inc., Wilmington, DE, USA) with 230, 260, and 280 nm readings. RNA quality was assessed for all samples by visualization on a denaturing formaldehyde RNA gel (protocol recommended by Qiagen, Valencia, CA, USA) and ethidium bromide staining. Total RNA was DNase treated with the TURBO DNA-free™ kit (Ambion Life Technologies, Carlsbad, CA, USA) as per the manufacturer's protocol to remove any remaining genomic DNA from the samples.

qPCR was used to determine relative transcript abundance in cardiac ventricle tissue of two gene targets from three different species of tuna. First-strand cDNA was synthesized using 1 µg of total RNA and iScript™ reverse transcript supermix, according to the manufacturer's instructions (BIO-RAD, CA, USA). Assays were performed on the CFX Connect™, using SsoAdvanced™ SYBR® Green supermix (BIO-RAD, CA, USA). A total reaction volume of 10 µl was used. The reaction mix included a final cDNA template concentration of 0.5 ng, 150 – 200 nM for each primer, 5 µl SsoAdvanced™ SYBR® Green supermix with the remaining reaction volume of 10 µl consisting of RNA-free water. The qPCR assays were performed using the following conditions: 95°C for 3 min followed by 40 cycles of 95°C for 10 s and 55°C for 30 s, then 95°C for 10s and 55 - 95°C for 5s in 0.5°C increments. Dissociation curves were analyzed on all samples for presence of non-specific amplification. No-template controls and no-reverse-transcriptase controls were also performed to determine the presence of reagent and genomic contamination respectively. Standard dilution curves with a minimum of 4 points were generated for each assay using pooled cDNA from all the samples of the appropriate species. Amplification efficiencies for all assays ranged between 90 – 110 %.

qPCR assay specifics for each assay are indicated in Supplementary Table 1. Relative expression values for each gene were calculated using a standard curve method. To compare gene expression values across species, gene expression values calculated above for SERCA2 and RYR2 were normalized to beta-actin expression values in each species. Beta-actin normalized gene expression data followed a Gaussian distribution and was analyzed based on ordinary one-way ANOVA followed by Tukey's test to correct for multiple comparisons. Multiplicity adjusted *P*-values are reported.

### 1.3 Diet analysis

Stomachs were collected from PBFT, YFT, and ALB from the fishing vessel R/V Shogun during the months of July-October in the years 2008-2010. Stomachs were also collected from anglers returning from day trips during the same time period. Stomachs were collected from each species only during periods when all three species were being caught in the same general area, according to information from recreational boat captains. Only one stomach for each tuna species was analyzed per sampling site to eliminate pseudo-replication of a single day's feeding conditions. Stomachs were immediately frozen at -20°C prior to analysis.

Stomachs were thawed, opened, and the contents were removed by rinsing into a sieve. All identifiable prey items including whole prey, hard parts (otoliths, cephalopod beaks, vertebrae) and other organic material was removed and transferred to 95% ethanol. Contents were identified visually utilizing fish vertebrae (4), cephalopod beaks (5, 6), and otolith structure following Glaser *et al.* (7). Some prey were unidentifiable; these largely consisted of eyes (cephalopods) and vertebrae and otoliths (fishes) that were too degraded to be identified with confidence. We generated cumulative prey curves based on methods in Bizzarro *et al.* (8) (Fig. S4) to assess whether sample size of analyzed stomachs for each tuna species was adequate to properly represent diet. For each tuna species, cumulative prey curves neared asymptotic values within the range of the number of stomachs sampled (Fig. S4), indicating that our sample size for each tuna species was adequate to represent overall diet in the region of spatiotemporal overlap. Length and mass of identifiable prey were calculated using published algorithms for each species (9-12), when available. Energetic value of prey was then calculated using prey-specific energy densities (ED; kJ g<sup>-1</sup>) reported in Glaser *et al.* (7) for prey of the California Current.

A modified index of relative importance (IRI), using % prey energetic content in place of % volume was calculated for the top four items in each predator diet. The standard equation for IRI from Pinkas (5) is

$$IRI = (\% N + \% V) (\% F) \quad (1)$$

where *N* = number, *V* = volume, and *F* = frequency of occurrence. However, we were interested in the energetic contribution of prey to tuna diet. Therefore we used the modified equation:

$$IRI = (\% N + \% kJ) (\% F) \quad (2)$$

where KJ = the estimated energetic content of the given prey based on the mass of that prey item. IRI values were highest in all species for a few prevalent prey items, then decreased rapidly (Supplementary Tables 4-6). Therefore we report the IRIs for only the four most prevalent items in the diet of each tuna species.

The Shannon-Weiner Information Measure ( $H$ ) was also calculated for each tuna species. This index is a measure of diet diversity, and is calculated according to the equation from Wilson & Bossert (13):

$$H = -\sum_{i=1}^S (p_i) \ln(p_i) \quad (3)$$

where  $p_i$  is the proportion of a given food item, and can be relative number, mass, etc. We used relative kJ values (%  $kJ$ ) for  $p_i$ , with  $S = 4$  (the four most prominent items by energetic content in each tuna species' diet).

We calculated the prey-specific abundance (PSA) for the top four prey items in each tuna species. PSA is a measure of specialization on a particular prey item, and is defined as the percentage a prey taxon comprised of all prey items in only those stomachs in which that actual prey occurred (14). It is calculated following the equation from Amundsen *et al.* (14):

$$PSA_i = (\sum S_i / \sum S_t) \quad (4)$$

where PSA is the prey-specific abundance of prey  $i$ ,  $S_i$  is the stomach content comprised of prey  $i$ , and  $S_t$  is the total stomach content only in predators with prey  $i$  in their stomach (14). A PSA value  $> 0.5$  suggests specialization on that prey, with a value of 1 representing full specialization (14). We only found a PSA  $> 0.5$  for one prey species (sardine *Sardinops sagax*) in one tuna species (PBFT). We thus calculated PSA for sardine in all three tuna species to compare relative specialization on this prey resource across PBFT, YFT, and ALB.

We calculated mean kJ stomach<sup>-1</sup> for each tuna species. Mean kJ stomach<sup>-1</sup> and sardine PSA values were compared across tuna species using the non-parametric Kruskal Wallis test, with significance at  $\alpha = 0.05$ . Non-normality of PSA and kJ stomach<sup>-1</sup> data necessitated this non-parametric test.

Prey of high importance to all bluefin species (Atlantic bluefin *Thunnus thynnus*, Southern bluefin *T. maccoyii*, and PBFT *T. orientalis*) in various regions was assessed from the literature (Supplementary Table 7). We included any studies that concluded the dominance of one or a few prey in diets of three bluefin tuna species diets, in various ocean regions. Energy densities (kJ g<sup>-1</sup>) for these prey were reported in the literature (Supplementary Table 6).

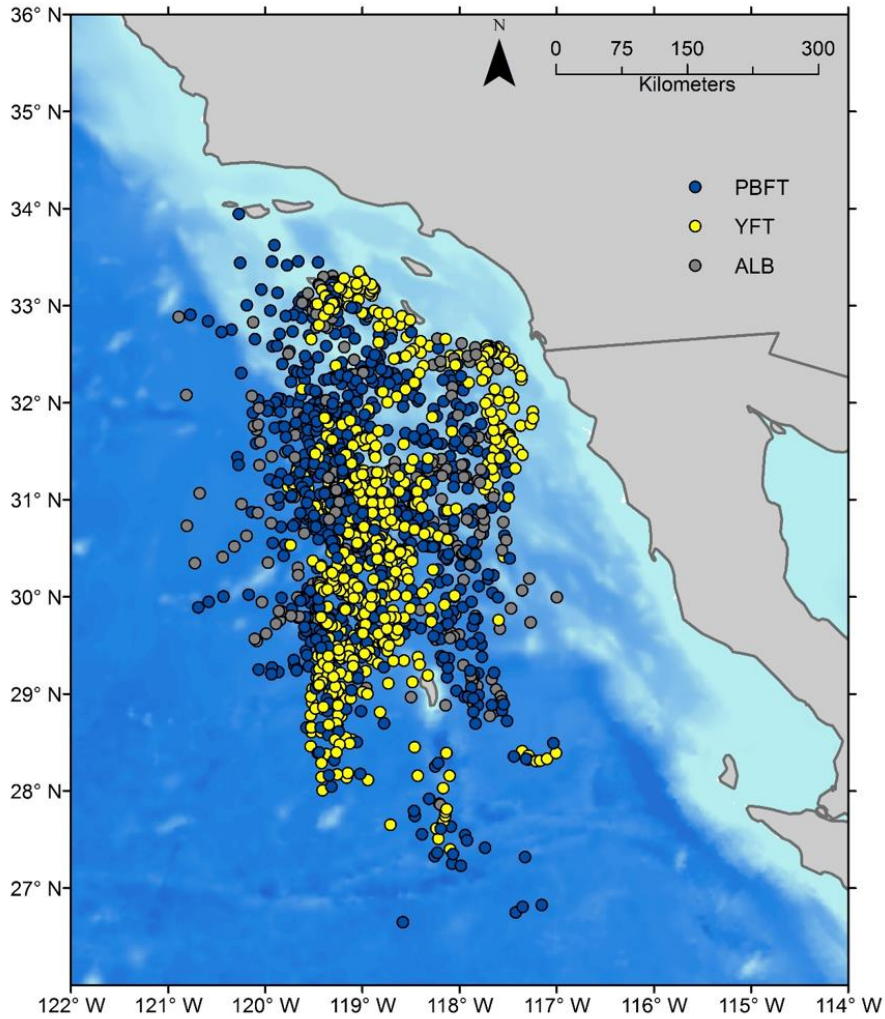

**Figure S1.** All geolocation positions, estimated from archival tag data, of Pacific bluefin tuna *Thunnus orientalis* ( $n = 725$  days), yellowfin tuna *T. albacares* (583 d), and albacore tuna *T. alalunga* (210 d) during periods of overlap. Circles are daily geolocation positions, colored for each species: Pacific bluefin tuna (PBFT; blue), yellowfin tuna (YFT; yellow), and albacore tuna (ALB; grey).

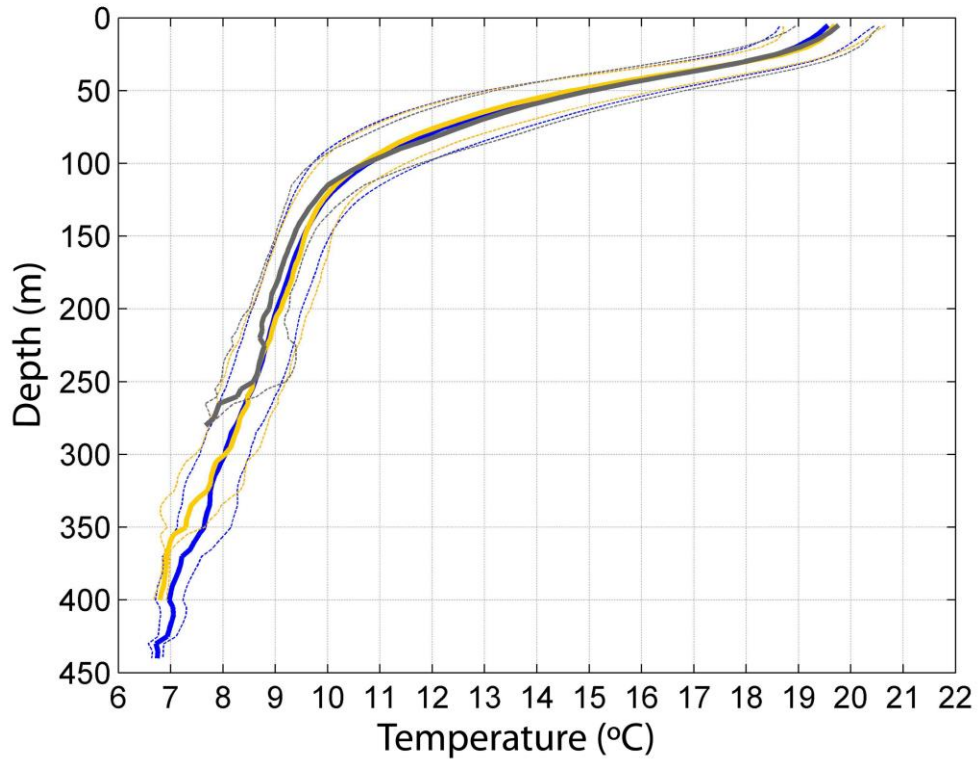

**Figure S2.** Reconstructed water column profiles utilizing archival tag data from all fish during periods of overlap. Solid lines are mean temperatures at depth for Pacific bluefin *Thunnus orientalis* (PBFT, blue), yellowfin *T. albacares* (YFT, yellow) and albacore *T. alalunga* (ALB, grey) and dotted lines the 95% CIs.

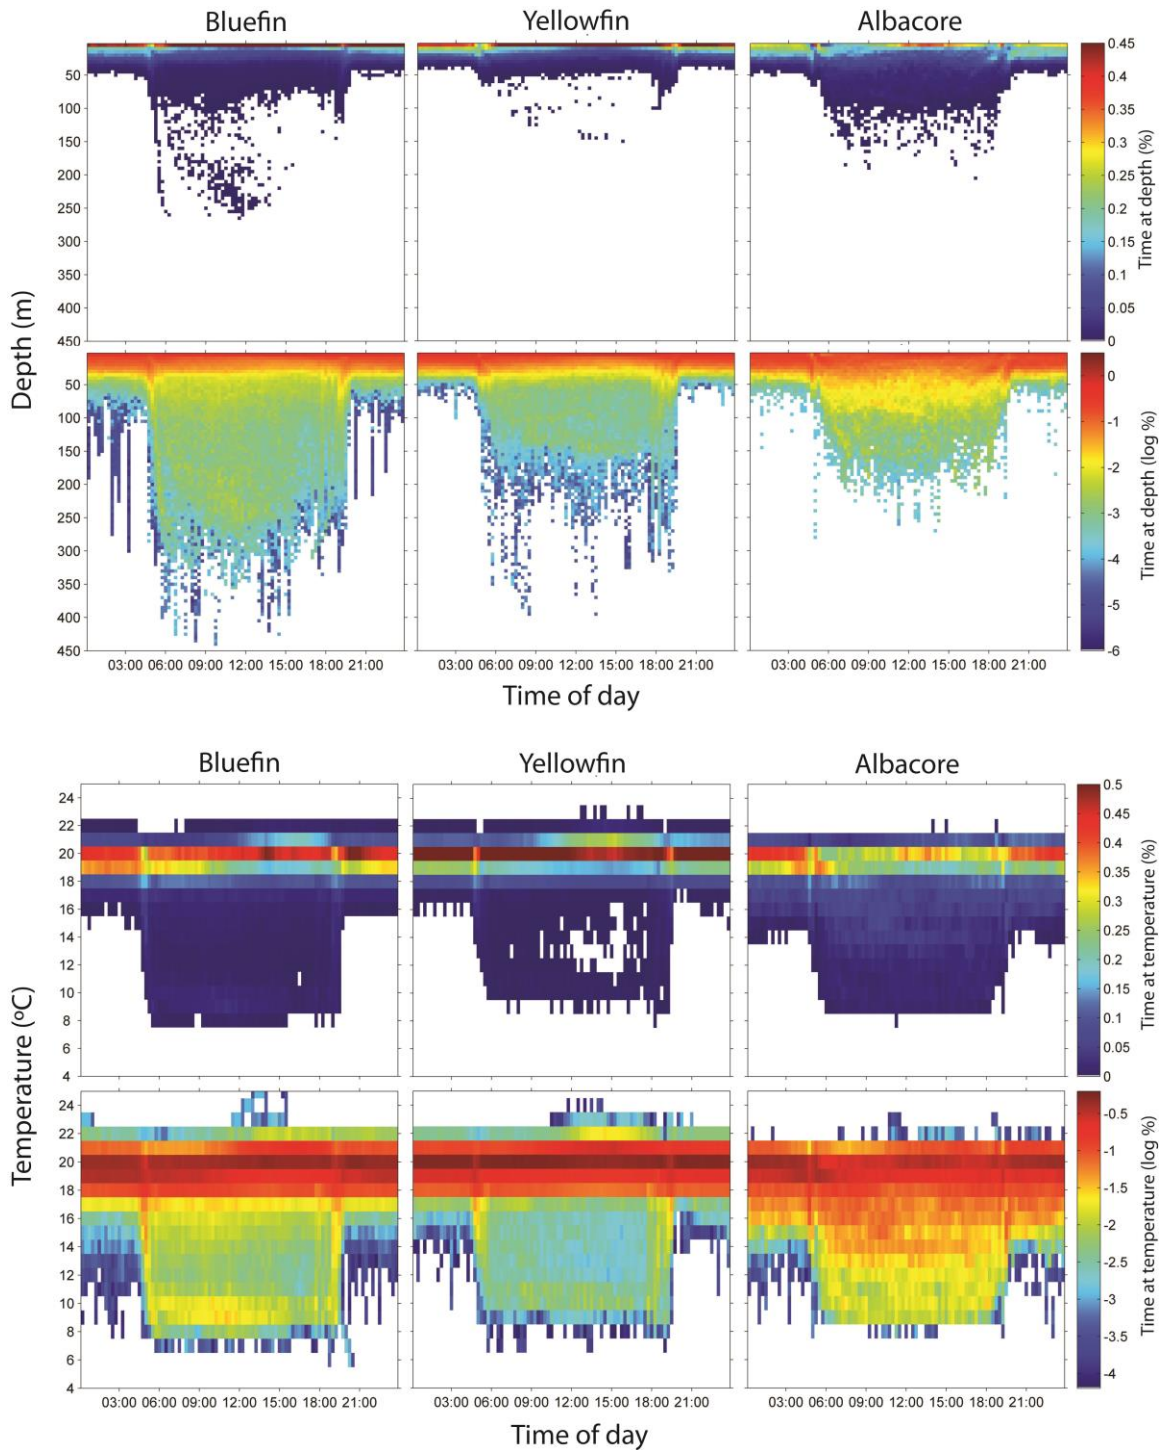

**Figure S3.** Time-at-depth (TAD, % and log %) and time-at-temperature (TAT, % and log %) by time of day for Pacific bluefin *Thunnus orientalis*, yellowfin *T. albacares* and albacore *T. alalunga* tuna during periods of overlap. Note that maximum values in the color bar represent values  $\geq$  that value.

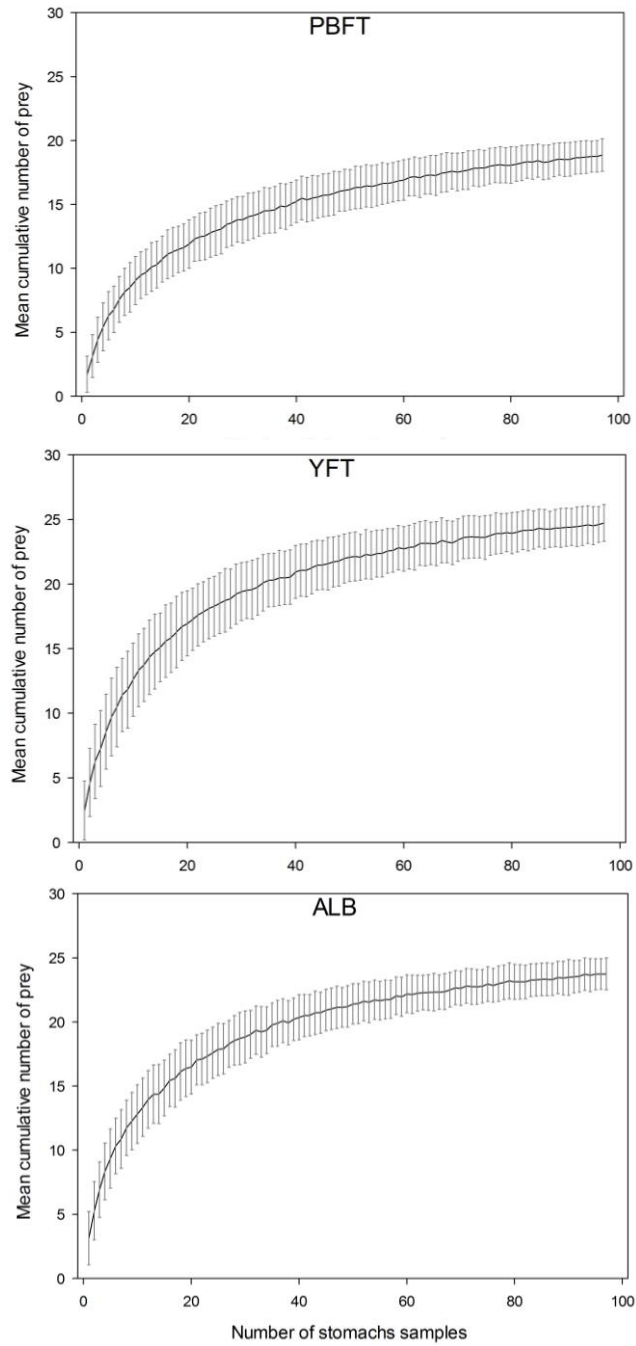

**Figure S4.** Mean cumulative prey curves for Pacific bluefin *Thunnus orientalis* (PBFT), yellowfin *T. albacares* (YFT), and albacore *T. alalunga* (ALB). Error bars show standard deviation (see Supplementary Tables 3-5 for specific diet information).



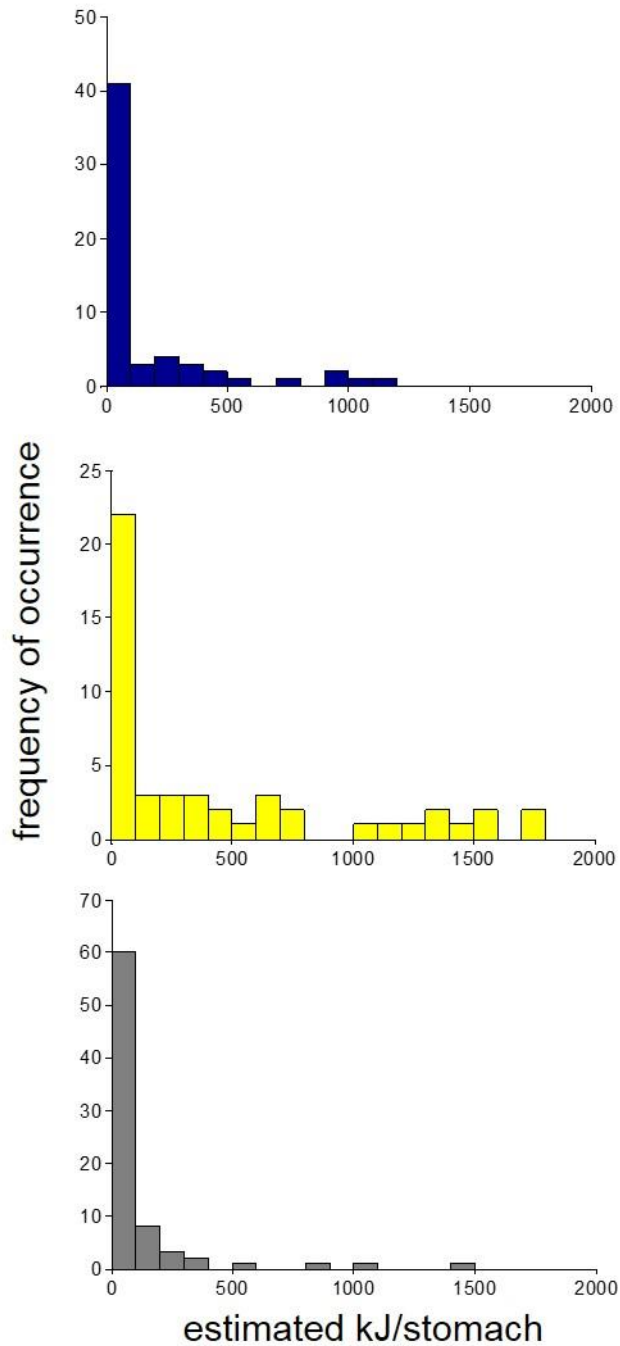

**Figure S5.** Histograms showing frequency distributions for estimates of kJ/stomach for Pacific bluefin *Thunnus orientalis* (blue), yellowfin *T. albacares* (yellow), and albacore *T. alalunga* (grey). Empty stomachs were not included.

**Table S1.** Quantitative PCR assay conditions for SERCA2, RYR2 and Beta-actin genes from three tuna species: Pacific bluefin *Thunnus orientalis* (PBFT), yellowfin *T. albacares* (YFT), and albacore *T. alalunga* (ALB).

| Gene name and aliases                                                                                                              | Gene symbol  | Primer sequence 5'-3' | Primer conc. (nM) | Species | Amplification efficiency (%) | Amplicon length (bp) | Genbank accession no. |
|------------------------------------------------------------------------------------------------------------------------------------|--------------|-----------------------|-------------------|---------|------------------------------|----------------------|-----------------------|
| ATPase, Ca <sup>++</sup> Transporting, Cardiac Muscle, Slow Twitch 2; Sarco/endoplasmic reticulum Ca <sup>2+</sup> -ATPase; SERCA2 | <i>SERCA</i> | aaggtgacagctgctctctga | 200               | PBFT    | 97.5                         | 150                  | KF468552              |
|                                                                                                                                    |              |                       |                   | ALB     | 91.9                         | 150                  | KF468551              |
|                                                                                                                                    |              | aatcggtacacagggcacaga | 200               | YFT     | 94.3                         | 150                  | KF468550              |
| Ryanodine Receptor 2 (Cardiac); Cardiac Muscle Ryanodine Receptor-Calcium Release Channel                                          | <i>RYR</i>   | tctgaacatatgcccaacga  | 150               | PBFT    | 98.2                         | 110                  | KF468549              |
|                                                                                                                                    |              |                       |                   | ALB     | 102.3                        | 110                  | KF468548              |
|                                                                                                                                    |              | ccactgccaaggatctcaat  | 150               | YFT     | 100.7                        | 110                  | KF468547              |
| Beta-Actin; Beta Cytoskeletal Actin                                                                                                | <i>Actb</i>  | caagagaggtatcctgacc   | 200               | PBFT    | 106.7                        | 95                   | KF536729              |
|                                                                                                                                    |              |                       |                   | ALB     | 93.8                         | 95                   | KF536728              |
|                                                                                                                                    |              | gtagaaggtgtgatgccag   | 200               | YFT     | 103                          | 95                   | KF536727              |

**Table S2.** Numbers of archival tag datasets from Pacific bluefin *Thunnus orientalis* (PBFT), yellowfin *T. albacares* (YFT), and albacore *T. alalunga* (ALB), and numbers and percentages, by month, of days for each species that were used in data analysis.

|              | <b>ALL</b>  | <b>87 fish</b> | <b>PBFT</b> | <b>43 fish</b> | <b>YFT</b> | <b>31 fish</b> | <b>ALB</b> | <b>13 fish</b> |
|--------------|-------------|----------------|-------------|----------------|------------|----------------|------------|----------------|
| <b>month</b> | <i>n</i>    | %              | <i>n</i>    | %              | <i>n</i>   | %              | <i>n</i>   | %              |
| 7            | 50          | 0.03           | 41          | 0.06           | 7          | 0.01           | 2          | 0.01           |
| 8            | 866         | 0.57           | 391         | 0.54           | 334        | 0.57           | 141        | 0.67           |
| 9            | 355         | 0.23           | 184         | 0.25           | 117        | 0.20           | 54         | 0.26           |
| 10           | 247         | 0.16           | 109         | 0.15           | 125        | 0.21           | 13         | 0.06           |
| <b>SUM</b>   | <b>1518</b> |                | <b>725</b>  |                | <b>583</b> |                | <b>210</b> |                |

**Table S3.** Depth and temperature bins where proportion of time spent by Pacific bluefin *Thunnus orientalis* (PBFT;  $n = 43$ ), yellowfin *T. albacares* (YFT;  $n = 31$ ), or albacore *T. alalunga* (ALB;  $n = 13$ ) were statistically higher than other two species. Rows are color coded to indicate the species that spent the most time in a given bin (blue: PBFT, gray: ALB, yellow: YFT). Proportional data were arcsine-transformed and compared using 1-way ANOVA. Significance reported at  $\alpha = 0.05$  and  $\alpha = 0.1$ . ‘ns’: not significant (no species spent significantly more time in that bin than the other two); n/a: no data or sample size too low for comparison.

| Depth<br>(m) | $\alpha$ |      | Temp<br>(°C) | $\alpha$ |      | Temp<br>(°C) | $\alpha$ |      |
|--------------|----------|------|--------------|----------|------|--------------|----------|------|
|              | 0.05     | 0.1  |              | 0.05     | 0.1  |              | 0.05     | 0.1  |
| 10           | ns       | ns   | 26           | PBFT     | PBFT | 25           | ns       | ns   |
| 20           | ALB      | ALB  | 25           | PBFT     | PBFT | 20           | YFT      | YFT  |
| 30           | ALB      | ALB  | 24           | ns       | ns   | 15           | ALB      | ALB  |
| 40           | ALB      | ALB  | 23           | ns       | ns   | 10           | ns       | ns   |
| 50           | ALB      | ALB  | 22           | ns       | ns   | 5            | ns       | PBFT |
| 60           | ALB      | ALB  | 21           | ns       | ns   | 0            | ns       | ns   |
| 70           | ALB      | ALB  | 20           | ns       | ns   |              |          |      |
| 80           | ALB      | ALB  | 19           | ns       | ns   |              |          |      |
| 90           | ALB      | ALB  | 18           | ns       | ns   |              |          |      |
| 100          | ns       | ns   | 17           | ALB      | ALB  |              |          |      |
| 110          | ns       | ns   | 16           | ALB      | ALB  |              |          |      |
| 120          | ns       | ns   | 15           | ALB      | ALB  |              |          |      |
| 130          | ns       | ns   | 14           | ALB      | ALB  |              |          |      |
| 140          | ns       | ns   | 13           | ALB      | ALB  |              |          |      |
| 150          | ns       | ns   | 12           | ALB      | ALB  |              |          |      |
| 160          | ns       | ns   | 11           | ns       | ALB  |              |          |      |
| 170          | ns       | ns   | 10           | ns       | ns   |              |          |      |
| 180          | ns       | ns   | 9            | ns       | ns   |              |          |      |
| 190          | ns       | PBFT | 8            | ns       | PBFT |              |          |      |
| 200          | ns       | ns   | 7            | ns       | PBFT |              |          |      |
| 210          | ns       | ns   | 6            | PBFT     | PBFT |              |          |      |
| 220          | ns       | PBFT | 5            | n/a      | n/a  |              |          |      |
| 230          | ns       | ns   | 4            | n/a      | n/a  |              |          |      |
| 240          | ns       | ns   | 3            | n/a      | n/a  |              |          |      |
| 250          | ns       | ns   | 2            | n/a      | n/a  |              |          |      |
| 260          | ns       | ns   | 1            | n/a      | n/a  |              |          |      |
| 270          | ns       | ns   |              |          |      |              |          |      |
| 280          | ns       | ns   |              |          |      |              |          |      |
| 290          | PBFT     | PBFT |              |          |      |              |          |      |
| 300          | PBFT     | PBFT |              |          |      |              |          |      |
| 310          | ns       | ns   |              |          |      |              |          |      |
| 320          | ns       | ns   |              |          |      |              |          |      |
| 330          | ns       | PBFT |              |          |      |              |          |      |
| 340          | ns       | ns   |              |          |      |              |          |      |
| 350          | ns       | ns   |              |          |      |              |          |      |
| 360          | ns       | ns   |              |          |      |              |          |      |
| 370          | ns       | ns   |              |          |      |              |          |      |
| 380          | ns       | ns   |              |          |      |              |          |      |
| 390          | ns       | ns   |              |          |      |              |          |      |
| 400          | ns       | ns   |              |          |      |              |          |      |
| 410          | PBFT     | PBFT |              |          |      |              |          |      |
| 420          | PBFT     | PBFT |              |          |      |              |          |      |
| 430          | PBFT     | PBFT |              |          |      |              |          |      |
| 440          | PBFT     | PBFT |              |          |      |              |          |      |
| 450          | n/a      | n/a  |              |          |      |              |          |      |
| 460          | n/a      | n/a  |              |          |      |              |          |      |
| 470          | n/a      | n/a  |              |          |      |              |          |      |
| 480          | n/a      | n/a  |              |          |      |              |          |      |

**Table S4.** Metrics showing prey species found in 82 Pacific bluefin (*Thunnus orientalis*) stomachs in 2008, 2009, and 2010. Metrics are as follows: N is abundance, %N is relative abundance, FO is frequency of occurrence by stomach, %FO is % of stomachs containing that food item. Total mass is mass of prey items estimated from length, otolith size (fish), or beak metrics (cephalopods), and total kJ is estimated from mass using energy density values from Glaser *et al.*(7). IRI is shown for the 4 most prevalent prey items. A hyphen (–) indicates that metric(s) could not be calculated because species were unidentified; ‘nd’ (‘no data’) indicates that conversion algorithms were not available for mass and kJ for that species.

| Order/Family       | Prey Category                   | N   | %N | FO | %FO | Total Mass (g) | Total kJ | IRI   |
|--------------------|---------------------------------|-----|----|----|-----|----------------|----------|-------|
| <b>FISHES</b>      |                                 |     |    |    |     |                |          |       |
| Carangidae         | <i>Trachurus symmetricus</i>    | 113 | 12 | 23 | 28  | 155            | 994      | 6.88  |
| Clupeidae          | <i>Sardinops sagax</i>          | 271 | 30 | 32 | 39  | 504            | 3681     | 26.59 |
| Engraulidae        | <i>Engraulis mordax</i>         | 4   | <1 | 1  | 1   | 11             | 70       |       |
| Labridae           | <i>Oxyjulis californica</i>     | 3   | <1 | 1  | 1   | nd             | nd       |       |
| Pleuronectidae     | <i>Pleuronichthys decurrens</i> | 1   | <1 | 1  | 1   | nd             | nd       |       |
| Scomberesocidae    | <i>Cololabis saira</i>          | 2   | <1 | 2  | 2   | <1             | 1        |       |
| Scombridae         | <i>Scomber japonicus</i>        | 8   | 1  | 2  | 2   | 9              | 61       |       |
|                    | <i>Scomber australasicus</i>    | 1   | <1 | 1  | 1   | nd             | nd       |       |
| Sebastidae         | <i>Sebastes</i> spp.            | 10  | 1  | 3  | 4   | 66             | 278      |       |
| Zoarcidae          | <i>Melanostigma pammelas</i>    | 126 | 14 | 3  | 4   | 325            | 2308     | 1.44  |
| Fishes unid.       |                                 | 67  | 7  | 22 | 27  | –              | –        |       |
| <b>CEPHALOPODS</b> |                                 |     |    |    |     |                |          |       |
| Gonatidae          | <i>Gonatus</i> spp.             | 12  | 1  | 4  | 5   | 12             | 54       |       |
| Loliginidae        | <i>Doryteuthis opalescens</i>   | 7   | 1  | 3  | 4   | 76             | 335      |       |
| Octopodidae        | <i>Octopus bimaculatus</i>      | 6   | <1 | 2  | 2   | <1             | 2        |       |
| Ommastrephidae     | <i>Dosidicus gigas</i>          | 20  | 2  | 6  | 7   | 1511           | 6647     | 3.55  |
| Ceph. unid.        |                                 | 54  | 6  | 18 | 22  | –              | –        |       |
| <b>CRUSTACEA</b>   |                                 |     |    |    |     |                |          |       |
| Amphipoda          | <i>Hyperiidea</i> unid.         | 32  | 4  | 6  | 7   | nd             | nd       |       |
| Euphausiacea       | Euphausiid                      | 111 | 2  | 5  | 6   | 32             | 200      |       |
| Crust. unid.       |                                 | 99  | 11 | 20 | 24  | –              | –        |       |

**Table S5.** Metrics showing prey species found in 86 albacore (*Thunnus alalunga*) stomachs in 2008, 2009, and 2010. Metrics are as follows: N is abundance, %N is relative abundance, FO is frequency of occurrence by stomach, %FO is % of stomachs containing that food item. Total mass is mass of prey items estimated from length, otolith size (fish), or beak metrics (cephalopods), and total kJ is estimated from mass using energy density values from Glaser *et al.*(7). IRI is shown for the 4 most prevalent prey items. A hyphen (–) indicates that metric(s) could not be calculated because species were unidentified; ‘nd’ (‘no data’) indicates that conversion algorithms were not available for mass and kJ for that species.

| Order/Family       | Prey Category                        | N   | %N | FO | %FO | Total mass (g) | Total kJ | IRI   |
|--------------------|--------------------------------------|-----|----|----|-----|----------------|----------|-------|
| <b>FISHES</b>      |                                      |     |    |    |     |                |          |       |
| Carangidae         | <i>Trachurus symmetricus</i>         | 179 | 11 | 35 | 41  | 452            | 2894     | 23.44 |
| Clupeidae          | <i>Sardinops sagax</i>               | 51  | 3  | 25 | 29  | 122            | 887      | 4.97  |
| Engraulidae        | <i>Engraulis mordax</i>              | 6   | <1 | 2  | 2   | 16             | 105      |       |
| Kyphosidae         | <i>Medialuna californiensis</i>      | 1   | <1 | 1  | 1   | nd             | nd       |       |
| Myctophidae        | <i>Triphoturus mexicanus</i>         | 6   | <1 | 6  | 7   | nd             | nd       |       |
| Scomberesocidae    | <i>Cololabis saira</i>               | 7   | <1 | 5  | 6   | <1             | 3        |       |
| Scombridae         | <i>Scomber japonicus</i>             | 4   | <1 | 2  | 2   | 0.1            | 1        |       |
| Sebastidae         | <i>Sebastes</i> spp.                 | 29  | 2  | 9  | 10  | 21             | 90       |       |
| Fishes unid.       |                                      | 111 | 7  | 30 | 35  | –              | –        |       |
| <b>CEPHALOPODS</b> |                                      |     |    |    |     |                |          |       |
| Argonautidae       | <i>Argonauta argo</i>                | 13  | 1  | 8  | 9   | nd             | nd       |       |
| Enoploteuthidae    | <i>Abraliopsis affinis</i>           | 1   | <1 | 1  | 1   | 0.1            | 0.5      |       |
|                    | <i>Abraliopsis felis</i>             | 19  | 1  | 11 | 13  | 35             | 155      |       |
| Gonatidae          | <i>Gonatus</i> spp.                  | 176 | 11 | 44 | 51  | 154            | 678      | 13.50 |
| Loliginidae        | <i>Doryteuthis opalescens</i>        | 79  | 5  | 3  | 3   | 372            | 1639     |       |
| Octopodidae        | <i>Octopus bimaculatus</i>           | 24  | 2  | 10 | 12  | 3              | 11       |       |
|                    | <i>Octopoteuthis sicula</i>          | 19  | 1  | 7  | 8   | 10             | 46       |       |
| Octopoteuthidae    | <i>Octopoteuthis</i> spp.            | 2   | <1 | 1  | 1   | 1              | 6        |       |
|                    | <i>Ocythoe tuberculata</i>           | 1   | <1 | 1  | 1   | nd             | nd       |       |
| Ommastrephidae     | <i>Dosidicus gigas</i>               | 1   | <1 | 1  | 1   | 55             | 240      |       |
| Onychoteuthidae    | <i>Onychoteuthis borealijaponica</i> | 17  | 1  | 4  | 5   | 13             | 59       |       |
| Ceph. unid.        |                                      | 143 | 9  | 31 | 36  | –              | –        |       |
| <b>CRUSTACEA</b>   |                                      |     |    |    |     |                |          |       |
| Amphipoda          | <i>Hyperiid</i> unid                 | 20  | 1  | 6  | 7   | nd             | nd       |       |
| Decapoda           | <i>Pleuroncodes planipes</i>         | 2   | <1 | 1  | 1   | 3              | 10       |       |
| Euphausiacea       | <i>Euphausiid</i>                    | 540 | 33 | 45 | 52  | 384            | 1190     | 35.88 |
| Crust. unid.       |                                      | 35  | 2  | 5  | 6   | –              | –        |       |

**Table S6.** Metrics showing prey species found in 75 yellowfin (*Thunnus albacares*) stomachs in 2008, 2009, and 2010. Metrics are as follows: N is abundance, % N is relative abundance, FO is frequency of occurrence by stomach, % FO is % of stomachs containing that food item. Total mass is mass of prey items estimated from length, otolith size (fish), or beak metrics (cephalopods), and total kJ is estimated from mass using energy density values from Glaser *et al.*(7). IRI is shown for the 4 most prevalent prey items. A hyphen (–) indicates that metric(s) could not be calculated because species were unidentified; ‘nd’ (no data’) indicates that conversion algorithms were not available for mass and kJ for that species.

| Order/Family       | Prey Category                        | N   | %N | FO | %FO | Total mass (g) | Total kJ | IRI   |
|--------------------|--------------------------------------|-----|----|----|-----|----------------|----------|-------|
| <b>FISHES</b>      |                                      |     |    |    |     |                |          |       |
| Carangidae         | <i>Trachurus symmetricus</i>         | 158 | 14 | 39 | 52  | 437            | 2798     | 16.71 |
| Clupeidae          | <i>Sardinops sagax</i>               | 223 | 20 | 27 | 36  | 1147           | 8372     | 21.97 |
| Engraulidae        | <i>Engraulis mordax</i>              | 32  | 3  | 1  | 1   | 85             | 560      |       |
| Myctophidae        | <i>Triphoturus mexicanus</i>         | 12  | 1  | 2  | 3   |                |          |       |
| Scomberesocidae    | <i>Cololabis saira</i>               | 35  | 3  | 8  | 11  | 33             | 250      |       |
| Scombridae         | <i>Scomber japonicus</i>             | 3   | <1 | 4  | 5   | 2              | 12       |       |
|                    | <i>Scomber australasicus</i>         | 1   | <1 | 1  | 1   | 33             | 221      |       |
|                    | <i>Auxis</i> spp.                    | 2   | <1 | 1  | 1   | 0.2            | 1        |       |
| Sebastidae         | <i>Sebastes</i> spp.                 | 171 | 16 | 6  | 8   | 142            | 596      |       |
| Syngnathidae       | <i>Syngnathus californiensis</i>     | 6   | 1  | 3  | 4   | nd             | nd       |       |
| Fishes unid.       |                                      | 79  | 7  | 22 | 29  | –              | –        |       |
| <b>CEPHALOPODS</b> |                                      |     |    |    |     |                |          |       |
| Argonautidae       | <i>Argonauta argo</i>                | 17  | 2  | 10 | 13  | nd             | nd       |       |
| Enoploteuthidae    | <i>Abraliopsis felis</i>             | 10  | 1  | 5  | 7   | 49             | 214      |       |
| Gonatidae          | <i>Gonatus</i> spp.                  | 22  | 2  | 10 | 13  | 26             | 113      |       |
| Loliginidae        | <i>Doryteuthis opalescens</i>        | 147 | 13 | 14 | 19  | 2152           | 9470     | 10.30 |
| Octopodidae        | <i>Octopus bimaculatus</i>           | 34  | 3  | 6  | 8   | 8              | 34       |       |
|                    | <i>Octopoteuthis sicula</i>          | 1   | <1 | 1  | 1   | <1             | 3        |       |
| Octopoteuthidae    | <i>Octopoteuthis</i> spp.            | 2   | <1 | 2  | 3   | 2              | 10       |       |
|                    | <i>Ocythoe tuberculata</i>           | 4   | <1 | 3  | 4   | nd             | nd       |       |
| Ommastrephidae     | <i>Dosidicus gigas</i>               | 12  | 1  | 6  | 8   | 1589           | 6991     | 2.12  |
| Onychoteuthidae    | <i>Onychoteuthis borealijaponica</i> | 3   | <1 | 3  | 4   | 39             | 170      |       |
| Teuthidae          | <i>Leachia</i> spp.                  | 2   | <1 | 1  | 1   | <1             | 2        |       |
| Ceph. unid.        |                                      | 37  | 3  | 12 | 16  | –              | –        |       |
| <b>CRUSTACEA</b>   |                                      |     |    |    |     |                |          |       |
| Amphipoda          | <i>Hyperiidea</i> unid               | 11  | 1  | 3  | 4   | nd             | nd       |       |
| Euphausiacea       | <i>Euphausiid</i>                    | 3   | <1 | 3  | 4   | 4              | 11       |       |
| Crust. unid.       |                                      | 49  | 4  | 11 | 15  | –              | –        |       |

**Table S7.** Dominant prey for three bluefin tuna species: Atlantic (*Thunnus thynnus*), Pacific (*T. orientalis*), and southern (*T. maccoyii*) bluefin tuna. Prey energy density (ED; kJ g<sup>-1</sup>) are shown. For comparison, major prey items of yellowfin tuna (*T. albacares*) and albacore (*T. alalunga*) and associated prey ED are also shown.

| <b>Tuna species</b>  | <b>Region</b>                | <b>Preferred prey</b>          | <b>ED</b>   | <b>Reference</b>                                                    |
|----------------------|------------------------------|--------------------------------|-------------|---------------------------------------------------------------------|
| <i>T. orientalis</i> | E. Pacific                   | <i>Sardinops sagax</i>         | 7.3 (7)     | this study                                                          |
|                      |                              | <i>Engraulis mordax</i>        | 6.6 (7)     | Pinkas (5)                                                          |
| <i>T. orientalis</i> | W. Pacific                   | <i>Etrumeus teres</i>          | 7.5 (15)    | Shimose <i>et al.</i> (16)                                          |
|                      |                              | <i>Engraulis japonicas</i>     | 6.6 (7)     | Shimose <i>et al.</i> (16); Yamanaka <i>et al.</i> (17)             |
|                      |                              | <i>Sardinops melanostictus</i> | 7.3 (7)     | Shimose <i>et al.</i> (16)                                          |
| <i>T. thynnus</i>    | W. Atlantic                  | <i>Clupea harengus</i>         | 12.6 (18)   | Chase (21); Estrada <i>et al.</i> (22)                              |
|                      |                              | <i>Ammodytes americanus</i>    | 7.3 (19)    | Logan <i>et al.</i> (23); Chase (21); Estrada <i>et al.</i> (22)    |
|                      |                              | <i>Scomber scombrus</i>        | 10.3 (17)   | Chase (21)                                                          |
|                      |                              | <i>Engraulis encrasicolus</i>  | 6-8.4 (20)  | Logan <i>et al.</i> (23)                                            |
| <i>T. thynnus</i>    | E. Atlantic                  | <i>Engraulis encrasicolus</i>  | 6-8.4 (20)  | Ortiz de Zarate & Cort (24)                                         |
| <i>T. thynnus</i>    | Med                          | <i>Engraulis encrasicolus</i>  | 6-8.4 (20)  | Collette and Nauen (26)                                             |
| <i>T. thynnus</i>    | W. Atlantic<br>(N. Carolina) | <i>Sardina pilchardus</i>      | 4-14.2 (25) | Sanz Brau (27); Orsini Relini <i>et al.</i> (28)                    |
|                      |                              | <i>Myctophid spp.</i>          | 7.1 (7)     | Karakulak <i>et al.</i> (29)                                        |
|                      |                              | <i>Trachurus spp.</i>          | 6.4 (7)     | Karakulak <i>et al.</i> (29)                                        |
|                      |                              | <i>Brevoortia tyrannus</i>     | 6.2 (30)    | Butler (31)                                                         |
| <i>T. maccoyii</i>   | Australia                    | <i>Sardinops neopilchardus</i> | 5.6 (32)    | Ward <i>et al.</i> (34)                                             |
|                      |                              | <i>Engraulis australis</i>     | 5.2 (33)    | Ward <i>et al.</i> (34)                                             |
|                      |                              | <i>Scomber australasicus</i>   |             | Ward <i>et al.</i> (34)                                             |
| <i>T. maccoyii</i>   | E. Tasmania                  | <i>Sardinops neopilchardus</i> | 5.6 (32)    | Fitzgibbon <i>et al.</i> (32)                                       |
| <i>T. alalunga</i>   | E. Pacific                   | <i>Euphausiid spp.</i>         | 3.1 (7)     | this study; Madigan <i>et al.</i> (35)                              |
| <i>T. alalunga</i>   | E. Pacific                   | <i>Trachurus symmetricus</i>   | 6.4 (7)     | this study                                                          |
| <i>T. alalunga</i>   | E. Pacific                   | <i>squids</i>                  | 4.4 (7)     | this study                                                          |
| <i>T. alalunga</i>   | E. Pacific                   | <i>amphipods</i>               | 2.5 (7)     | Pinkas (5)                                                          |
| <i>T. alalunga</i>   | S. Pacific                   | <i>squids</i>                  | 4.4 (7)     | Young <i>et al.</i> (36)                                            |
| <i>T. alalunga</i>   | E. Pacific,<br>NPTZ          | <i>Engraulis mordax</i>        | 6.6 (7)     | Pinkas (5); Bernard <i>et al.</i> (37); Watanabe <i>et al.</i> (38) |
| <i>T. albacares</i>  | E. Pacific                   | <i>Sardinops sagax</i>         | 7.3 (7)     | this study                                                          |
| <i>T. albacares</i>  | E. Pacific                   | <i>Trachurus symmetricus</i>   | 6.4 (7)     | this study                                                          |
| <i>T. albacares</i>  | CPO                          | <i>Malacostracans</i>          | 3.2 (7)     | Graham <i>et al.</i> (39)                                           |
| <i>T. albacares</i>  | CPO                          | <i>squids</i>                  | 4.4 (7)     | Graham <i>et al.</i> (39)                                           |
| <i>T. albacares</i>  | W. Atlantic                  | <i>squids</i>                  | 4.4 (7)     | Rudershausen <i>et al.</i> (40)                                     |
| <i>T. albacares</i>  | E. Pacific                   | <i>pelagic red crab</i>        | 3.0 (7)     | Olson <i>et al.</i> (41)                                            |



## REFERENCES: SUPPORTING INFORMATION

1. Block BA, *et al.* (2011) Tracking apex marine predator movements in a dynamic ocean. *Nature* 475:86-90.
2. Carlisle AB, Perle CR, Goldman KJ, Block BA (2011) Seasonal changes in depth distribution of salmon sharks (*Lamna ditropis*) in Alaskan waters: implications for foraging ecology. *Can J Fish Aquat Sci* 68(11):1905-1921.
3. Kara AB, Rochford PA, Hurlburt HE (2000) An optimal definition for ocean mixed layer depth. *J Geophys Res* 105(C7):803-816,821.
4. Clothier CR (1952) A key to some Southern California fishes based on vertebral characteristics. *Fish Bull* 79:1-87.
5. Pinkas L, Oliphant MS, Iverson ILK (1971) Food habits of albacore, bluefin tuna, and bonito in California waters. *Fish Bull Cal Dept Fish Game* 152:1-105.
6. Clarke MR (1986) *A handbook for the identification of cephalopod beaks.* (Oxford University Press, New York).
7. Glaser S (2010) Interdecadal variability in predator-prey interactions of juvenile North Pacific albacore in the California Current System. *Mar Ecol Prog Ser* 414:209-221.
8. Bizzarro JJ, Robinson HJ, Rinewalt CS, Ebert DA (2009) Comparative feeding ecology of four sympatric skate species off central California, USA. *Biology of Skates*, Developments in Environmental Biology of Fishes 27, eds Ebert DA & Sulikowski JA (Springer Netherlands), Vol 27, pp 91-114.
9. Wolff GA (1984) Identification and estimation of size from the beaks of 18 species of cephalopods from the Pacific Ocean. in *NOAA Technical Report (NMFS)*.
10. Harvey JT, Loughlin TR, Perez MA, Oxman DS (2000) Relationship between fish size and otolith length for 63 species of fishes from the Eastern North Pacific Ocean. in *NOAA Technical Report NMFS (NMFS)*.
11. Mauchline J (1967) Volume and Weight Characteristics of Species of Euphausiacea. *Crustaceana* 13(3):241-248.
12. Gómez-Gutiérrez J & Sánchez-Ortíz CA (1997) Larval Drift and Population Structure of the Pelagic Phase of *Pleuroncodes Planipes* (Stimpson) (Crustacea: Galatheidae) off the Southwest Coast of Baja California, Mexico. *Bulletin of Marine Science* 61(2):305-325.
13. Wilson EO & Bossert WH (1971) *A primer of population biology* (Sinauer, Sunderland, MA) p 192.
14. Amundsen PA, Gabler HM, Staldvik FJ (1996) A new approach to graphical analysis of feeding strategy from stomach contents data—modification of the Costello (1990) method. *J Fish Biol* 48(4):607-614.
15. Abitia-Cardenas LA, Galván-Magaña F, Rodríguez-Romero J (1997) Food habits and energy values of prey of striped marlin, *Tetrapturus audax*, off the coast of Mexico. *Fish Bull* 95(2):360-368.
16. Shimose T, Watanabe H, Tanabe T, Kubodera T (2012) Ontogenetic diet shift of age-0 year Pacific bluefin tuna *Thunnus orientalis*. *J Fish Biol*:DOI 10.1111/j.1095-8649.2012.03483.x.

17. Yamanaka H (1963) Synopsis of biological data on kuromaguro *Thunnus orientalis* (Temminck & Schlegel) 1942 (Pacific Ocean). *FAO Fish Rep* 6:180-217.
18. Markussen NH, Ryg M, Lydersen C (1992) Food consumption of the NE Atlantic minke whale (*Balaenoptera acutorostrata*) population estimated with a simulation model. *ICES J Mar Sci* 49(3):317-323.
19. Montevecchi WA, Ricklefs RE, Kirkham IR, Gabaldon D (1984) Growth energetics of nestling Northern Gannets (*Sula bassanus*). *Auk* 101:334-341.
20. Dubreuil J & Petitgas P (2009) Energy density of anchovy *Engraulis encrasicolus* in the Bay of Biscay *J Fish Biol* 74(3):521-534.
21. Chase BC (2002) Differences in diet of Atlantic bluefin tuna (*Thunnus thynnus*) at five seasonal feeding grounds on the New England continental shelf. *Fish Bull* 100:168-180.
22. Estrada JA, Lutcavage M, Thorrold SR (2005) Diet and trophic position of Atlantic bluefin tuna (*Thunnus thynnus*) inferred from stable carbon and nitrogen isotope analysis. *Mar Biol* 147(1):37-45.
23. Logan JM, *et al.* (2011) Diet of young Atlantic bluefin tuna (*Thunnus thynnus*) in eastern and western Atlantic foraging grounds. *Mar Biol* 158(1):73-85.
24. Zarate VOd & Cort JL (1986) Stomach contents study of immature bluefin tuna in the Bay of Biscay. *ICES-CM H* 26:10.
25. Rosa R, *et al.* (2010) Bioenergetics of small pelagic fishes in upwelling systems: relationship between fish condition, coastal ecosystem dynamics and fisheries. *Mar Ecol Prog Ser* 410:205-218.
26. Collette BB & Nauen CE (1983) *FAO Fisheries Synopsis* p 137.
27. Sanz-Brau A (1990) Sur la nourriture des jeunes thons rouges *Thunnus thynnus* (L. 1758) des côtes du Golfe de Valence. *CIESM* 32:274.
28. Orsi Relini L, Garibaldi F, Cima C, Palandri G (1995) Feeding of the swordfish, the bluefin and other pelagic nekton in the western Ligurian Sea. *Collect Vol Sci Pap ICCAT* 44:283-286.
29. Karakulak FS, Salman A, Oray IK (2009) Diet composition of bluefin tuna (*Thunnus thynnus* L. 1758) in the Eastern Mediterranean Sea, Turkey. *Journal of Applied Ichthyology* 25(6):757-761.
30. Durbin EG & Durbin AG (1981) Assimilation efficiency and nitrogen excretion of a filter feeding planktivore, the Atlantic menhaden, *Brevoortia tyrannus* (Pisces: Clupeidae). *Fish Bull* 79(4):601-616.
31. Butler CM (2007) Atlantic Bluefin Tuna (*Thunnus thynnus*) feeding ecology and potential ecosystem effects during winter in North Carolina. M.S. (NC State University, Raleigh, NC).
32. Fitzgibbon QP, Seymour RS, Ellis D, Buchanan J (2007) The energetic consequence of specific dynamic action in southern bluefin tuna *Thunnus maccoyii*. *J Exp Biol* 210(2):290-298.
33. Bunce A (2001) Prey consumption of Australasian gannets (*Morus serrator*) breeding in Port Phillip Bay, southeast Australia, and potential overlap with commercial fisheries. *ICES J Mar Sci* 58:904-915.
34. Ward TM, *et al.* (2006) Pelagic ecology of a northern boundary current system: effects of upwelling on the production and distribution of sardine (*Sardinops*

- sagax*), anchovy (*Engraulis australis*) and southern bluefin tuna (*Thunnus maccoyii*) in the Great Australian Bight. *Fish Oceanogr* 15(3):191-207.
35. Madigan DJ, *et al.* (2012) Stable isotope analysis challenges wasp-waist food web assumptions in an upwelling pelagic food web. *Sci Rep* 2(654):e654.
  36. Young JW, *et al.* (2010) Feeding ecology and niche segregation in oceanic top predators off eastern Australia. *Mar Biol* 157(11):2347-2368.
  37. Bernard HJ, Hedgepeth JB, Reilly SB (1985) Stomach contents of albacore, skipjack, and bonito caught off southern California during summer 1983. *CalCOFI Report* (26): 175-183.
  38. Watanabe H, Kubodera T, Masuda S, Kawahara S (2004) Feeding habits of albacore *Thunnus alalunga* in the transition region of the central North Pacific. *Fish Sci* 70(4):573-579.
  39. Graham BS, Grubbs D, Holland K, Popp BN (2007) A rapid ontogenetic shift in the diet of juvenile yellowfin tuna from Hawaii. *Mar Biol* 150(4):647-658.
  40. Rudershausen PJ, *et al.* (2010) Feeding Ecology of Blue Marlins, Dolphinfin, Yellowfin Tuna, and Wahoos from the North Atlantic Ocean and Comparisons with other Oceans. *Transactions of the American Fisheries Society* 139(5):1335-1359.
  41. Olson RJ, *et al.* (2010) Food-web inferences of stable isotope spatial patterns in copepods and yellowfin tuna in the pelagic eastern Pacific Ocean. *Prog Oceanogr* 86(1-2):124-138.
